# Supplementary material for: Experimentally simulating the dynamics of quantum light and matter at deep-strong coupling
Source: PubMed Central journal article supplement (PMC5700074; doi:10.1038/s41467-017-01061-x), 2017-11-23
Supplement: 41467_2017_1061_MOESM1_ESM.pdf [file 41467_2017_1061_MOESM1_ESM.pdf]

## 1 Supplementary Note 1: Experimental setup

2 The sample and low-temperature microwave compo-  
 3 nents were mounted inside magnetic and infrared radi-  
 4 ation shielding consisting of two layers of cryogenic mu-  
 5 metal around a layer of aluminium, with an internal layer  
 6 of copper foil coated in a mixture of silicon carbide and  
 7 Stycast (2850 FT) [1]. Microwave coaxial cables are con-  
 8 nected to the PCB-mounted chip via non-magnetic SMP  
 9 connectors (Rosenberger).

10 The qubit drive and read-out tones are sent through  
 11 two dedicated feedlines which are connected via a short  
 12 coaxial cable off-chip. The input line for the qubit drives  
 13 is filtered at the mixing chamber with 30 dB cold at-  
 14 tenuation, a small home-built inline eccosorb filter and  
 15 a 10 GHz low-pass filter (K&L 6L250-10000/T20000-  
 16 0/0). [The resonator input line filter is 8 GHz low-pass  
 17 (K&L 6L250-8000/T18000-0/0).] The output line passes  
 18 through two 3–12 GHz isolators (Pamtech CWJ1019K)  
 19 and a circulator (Quinstar CTH0408KCS) mounted  
 20 above the mixing chamber on the way to a 4–8 GHz  
 21 cryogenic HEMT amplifier (Low-Noise Factory LNF-  
 22 LNC4\_8A), two room-temperature amplifiers (Miteq  
 23 AFS3-04000800-10-ULN, then AFS3-00101200-35-ULN-  
 24 R), RF demodulation (Marki 0618LXP IQ mixer) and  
 25 amplification, and finally digitised in a data acquisition  
 26 card (AlazarTech ATS9870). The flux-bias lines are fil-  
 27 tered at the mixing chamber with 1.35 GHz low-pass fil-  
 28 ters (Minicircuits VLFX-1350) followed by home-built ec-  
 29 cosorb filters. All input lines are thermalised with 20 dB  
 30 attenuators mounted at the 4 K plate. The microwave  
 31 input lines and output line are connected to the fridge  
 32 through a DC block.

33 Qubit and resonator drive pulses are created via single-  
 34 sideband modulation with IQ mixers and generated by  
 35 two arbitrary waveform generators (AWGs; Tektronix  
 36 AWG5014). We use a 3–7 GHz IQ mixer (Marki  
 37 0307MXP) for the resonator and two custom-built 4–  
 38 8.5 GHz IQ mixers (QuTech F1c: DC–3.5 GHz IF band-  
 39 width) for the qubit drives. The qubit drive pulses were  
 40 amplified by a high-power (35 dB) microwave ampli-  
 41 fier (Minicircuits ZV-3W-183) before passing through a  
 42 5.5 GHz low-pass filter (Minicircuits LFCN 5500+) to  
 43 minimise amplifier noise at the readout resonator fre-  
 44 quencies.

45 Most microwave units receive a 10 MHz reference from  
 46 a microwave generator (Agilent E8257D) via a home-  
 47 built distribution unit. However, the generators used  
 48 for driving  $Q_R$  and  $R_R$  (R&S SGS100A) synchronised  
 49 directly via a 1 GHz reference. This was critical to  
 50 achieving the phase stability required to measure  $R_R$   
 51 Wigner functions during measurement runs lasting up to  
 52 40 hours. The frequencies for these two generators were  
 53 also always set to a multiple of the trigger repetition rate  
 54 (5 kHz), to ensure a stable phase relationship. For phase-

55 sensitive measurements, a 500 MHz scope (Rigol DS4034)  
 56 monitored the relative trigger timing between the master  
 57 and slave AWGs to select consistent delay configurations  
 58 between the AWG outputs.

59 Home-built low-noise current sources mounted in a TU  
 60 Delft IVVI-DAC2 rack provided precision DC bias cur-  
 61 rents for flux tuning of the qubit frequencies. The DC  
 62 bias for  $Q_R$  was combined with the amplified output of  
 63 one channel of the master AWG (the same as used for  
 64 generating  $Q_R$  drive pulses) using a reactive bias tee  
 65 (Minicircuits ZFBT-6GW+). The flux pulses from the  
 66 AWG were amplified using a home-built 2 V/V flux-pulse  
 67 amplifier.

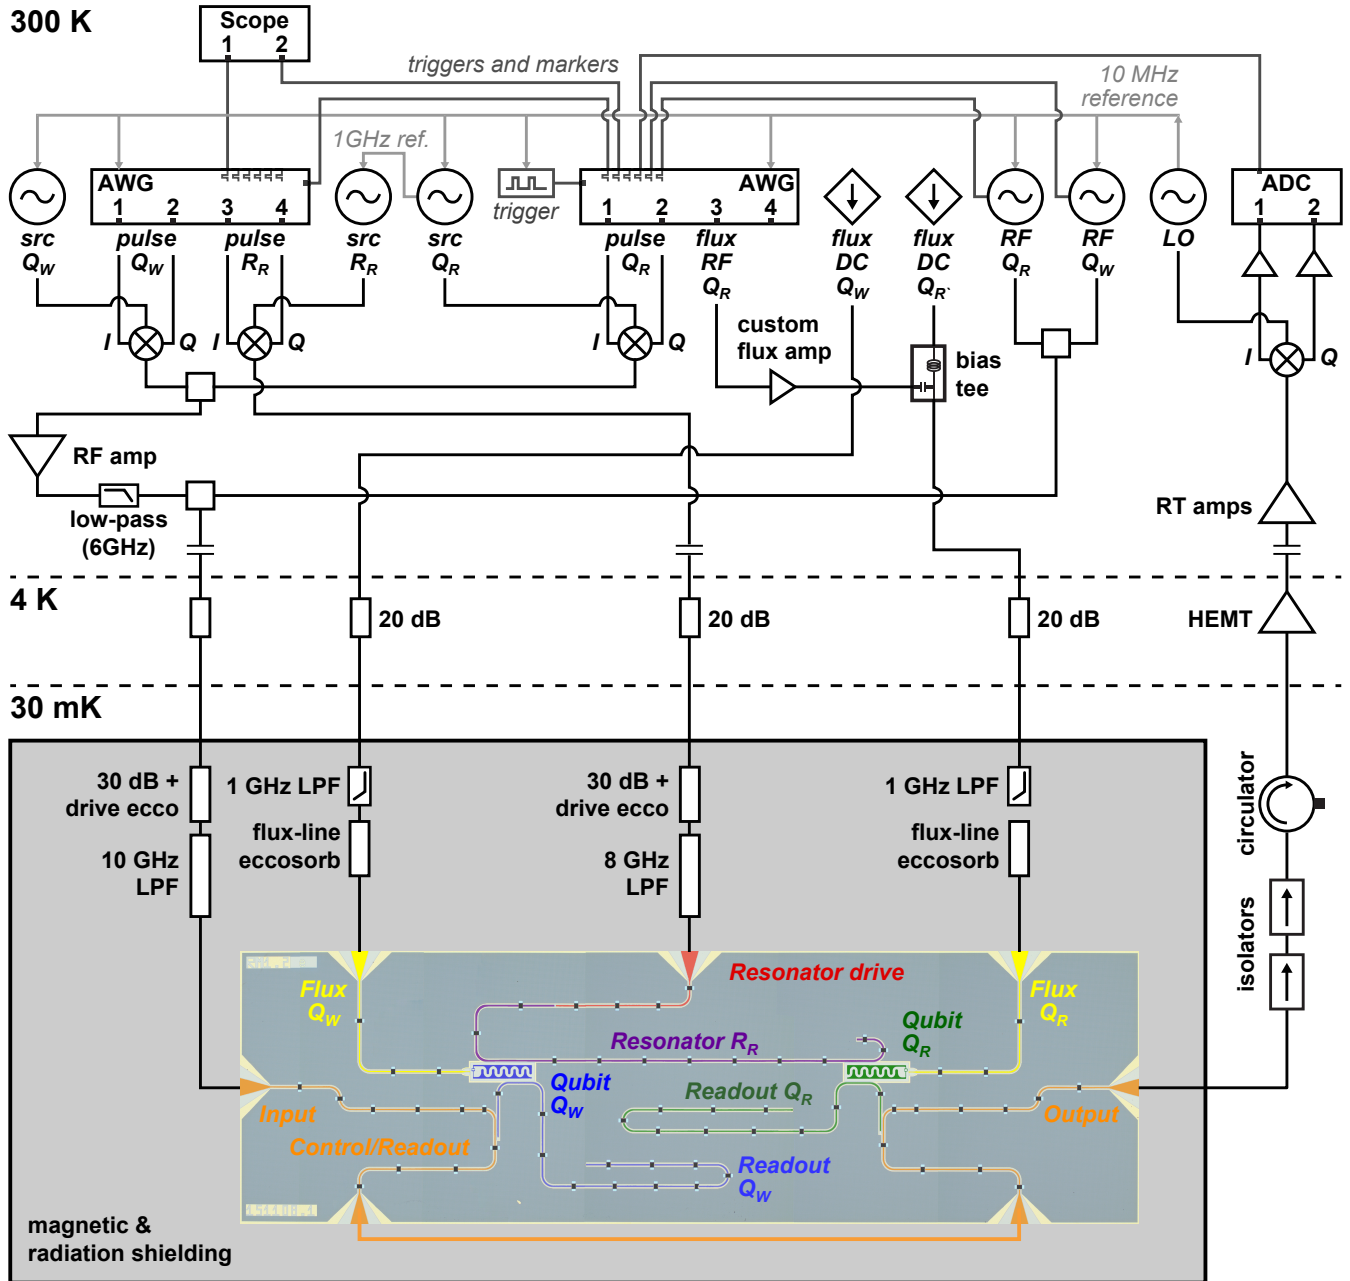

**Supplementary Figure 1. Experimental schematic showing the connectivity of microwave electronics and components in and outside the dilution refrigerator.** The sample mounted below the mixing chamber typically remained at around 30 mK. Qubit and resonator drive lines and flux-bias lines were thermalised and attenuated at the 4-K and 30-mK stages and were low-pass filtered before arriving at the sample. The qubits and resonator drive pulses were generated by AWGs and IQ mixers. Home-built low-noise current sources provided DC bias currents for qubit frequency tuning, which were combined with fast frequency-tuning bias pulses using reactive bias tees. AWG markers provided the gating for pulse-modulated measurement pulses.

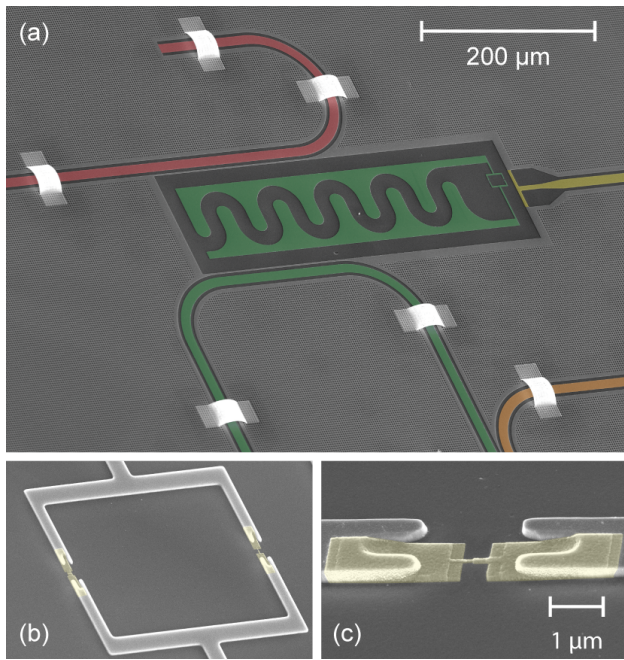

**Supplementary Figure 2. SEM images of a sister device with added false colour.** (a) Rabi qubit ( $Q_R$ ) with coupling to the Rabi resonator ( $R_R$ , above) and read-out resonator (below), showing the centred flux-bias line and displaced SQUID loop.  $Q_R$  is coupled to  $R_R$  near its shorted end in order to achieve the required small coupling  $g$ . (b, c) Josephson junctions are contacted to the NbTiN SQUID loop fingers using small bays to achieve better contact. In (b), it is possible to see the large asymmetry in junction size, with a zoom on the small junction in (c).

### 68 Supplementary Note 2: Device fabrication

69 The device was fabricated using a method similar to  
70 that of Ref. 2, but with several specific improvements:

- 71 1. The transmon design includes a rounded spacing  
72 between the shunt capacitor plates [Supplementary  
73 Fig. 2(a)] to avoid the regions of high electric field  
74 which can increase sensitivity to interface two-level  
75 fluctuators [3].
- 76 2. The flux-bias line was centred between the trans-  
77 mon capacitor plates to symmetrise the capacitive  
78 coupling with the goal of decoupling the qubits  
79 from possible decay-inducing effects of voltage noise  
80 fluctuations on the flux-bias lines.
- 81 3. As in our previous work [2], the transmon qubits  
82 were patterned with niobium titanium nitride  
83 (NbTiN) capacitor plates to further reduce suscep-  
84 tibility to noise from two-level fluctuators. Prior to  
85 evaporation of the aluminium (Al) junction layers,  
86 a short hydrogen-fluoride (HF) dip removed sur-  
87 face oxides to facilitate a good contact between the  
88 evaporated Al and NbTiN thin film. To avoid con-

89 tact problems caused by unwanted etching into the  
90 silicon substrate during patterning of the NbTiN,  
91 we: 1) optimised the reactive-ion etch (RIE) recipe  
92 and duration to minimise the substrate etch and  
93 eliminate underetch (under the NbTiN); and 2) in-  
94 troduced a narrow bay in the NbTiN fingers at the  
95 contact point to create a softer etch for more reli-  
96 able contact [Supplementary Fig. 2(c)].

- 97 4. The junction development process and double-  
98 angle evaporation parameters were optimised to  
99 improve the reliability of the very small junction  
100 sizes needed for the asymmetric qubit [Supplemen-  
101 tary Fig. 2(b)].

### 102 Supplementary Note 3: Device operating param- 103 eters and qubit performance

104 Supplementary Figure 3(a) shows the frequencies for  
105 the two qubits and three resonators on the device as a  
106 function of the applied qubit flux in units of the flux  
107 quantum  $\Phi_0 = h/2e$ , along with the operating points for  
108 both qubits during the quantum simulation experiments.  
109 Measured device parameters are summarised in Supple-  
110 mentary Table 1. Qubit  $T_1$ ,  $T_{2,\text{echo}}$  and  $T_2^*$  decay times  
111 are shown as a function of qubit frequency in Supplemen-  
112 tary Fig. 3(b,c,d).

113 At the operating point, the Rabi qubit  $Q_R$  was de-  
114 signed to sit below the resonator  $R_R$  and be pulsed  
115 up into resonance with it to avoid continually crossing  
116 the resonator with the  $Q_R$ 's 1-2 transition during the  
117 long flux-pulse sequence. Because of significant proto-  
118 col times and two operating points, an asymmetric qubit  
119 design with two flux-insensitive ‘‘sweet’’ spots was used  
120 for  $Q_R$  [5], with drive pulses applied at its bottom  
121 spot. The first-order flux insensitivity at this point also  
122 mitigated some of the impact of rapid, long-range flux-  
123 pulsing on the qubit pulse tuning. The maximum and  
124 minimum frequencies for  $Q_R$  in the final cooldown were  
125 6.670 GHz and 5.451 GHz, respectively.

126 The asymmetric design also minimised the stringent  
127 challenge of targetting the qubit frequency to resonator  
128 closely on the scale of the very small coupling fre-  
129 quency. Ideally, the resonator would have been closer  
130 to the qubit top sweet spot to maximise phase coher-  
131 ence also during the interaction pulses. However, with  
132 the asymmetric design, the reduced flux gradient re-  
133 laxes this constraint. With an asymmetry parameter of  
134  $\alpha = (E_{J,\text{max}} - E_{J,\text{min}}) / (E_{J,\text{max}} + E_{J,\text{min}}) \sim 0.68$ , the Ram-  
135 sey time  $T_2^*$  for  $Q_R$  did not typically drop below a few  
136 microseconds, even at the positions with steepest flux  
137 gradient.

138 The asymmetry of  $Q_R$  was smaller than targeted,  
139 with the result that the bottom sweet spot was also  
140 lower in frequency than intended. The ancilla qubit  $Q_W$

| Component | Frequency domain          |           | Time domain         |                       |
|-----------|---------------------------|-----------|---------------------|-----------------------|
| $Q_R$     | $f_{\max}$                | 6.670 GHz | At operating point: |                       |
|           | $f_{\min}$                | 5.451 GHz | $T_1$               | 20–30 $\mu\text{s}$   |
|           | $\alpha$ (asymmetry)      | 0.68      | $T_{2,\text{echo}}$ | 30–60 $\mu\text{s}$   |
|           | $E_C/2\pi$                | –281 MHz  | $T_2^*$             | 20–50 $\mu\text{s}$   |
|           | $f_{\text{readout}}$      | 7.026 GHz |                     |                       |
|           | $g_{\text{readout}}/2\pi$ | 43 MHz    |                     |                       |
| $R_R$     | $f$                       | 6.381 GHz | $T_{1,r}$           | 3–4 $\mu\text{s}$     |
|           | $g_r/2\pi$ (to $Q_R$ )    | 1.92 MHz  | $g_r/2\pi$          | 1.95 MHz              |
|           | $\chi_w/\pi$ (to $Q_W$ )  | –1.26 MHz |                     |                       |
| $Q_W$     | $f_{\max}$                | 5.653 GHz | At operating point: |                       |
|           | $f_{\text{exp}}$          | 5.003 GHz | $T_1$               | 30–40 $\mu\text{s}$   |
|           | $E_C$                     | —         | $T_{2,\text{echo}}$ | 5–7 $\mu\text{s}$     |
|           | $f_{\text{readout}}$      | 6.940 GHz | $T_2^*$             | 1.5–1.8 $\mu\text{s}$ |
|           | $g_{\text{readout}}/2\pi$ | 42 MHz    | At top sweet spot:  |                       |
|           |                           |           | $T_{2,\text{echo}}$ | 30–60 $\mu\text{s}$   |
|           |                           | $T_2^*$   | 20–50 $\mu\text{s}$ |                       |

**Supplementary Table 1. Measured device parameters and qubit and resonator performance.** The coupling strength between  $Q_R$  and  $R_R$  was measured both by spectroscopy of the avoided crossing, and time-domain measurement of the vacuum Rabi oscillation frequency. For both qubits, Ramsey sequences measured at the sweet spots exhibited beating consistent with quasiparticle tunnelling [4].  $T_2^*$ s reported here were measured by fitting a decaying double sinusoid to a long, beating Ramsey signal and represents the underlying coherence of the qubits. At the operating point for  $Q_W$  far from the sweet spot, no beating was observed in the Ramsey measurements.

(a standard symmetric transmon) was therefore operated around 650 MHz below its own maximum-frequency sweet spot of 5.653 GHz. At this operating point, its  $T_2^*$  was typically  $\gtrsim 1.5 \mu\text{s}$ . Because we were able to drive  $Q_W$  and achieve good photon-sensitive operation at this lower position, we chose not to rapidly tune its frequency up to the sweet spot to perform the photon meter measurements.

To identify the flux operating point that positioned  $Q_R$  precisely at the bottom sweet spot, we applied the following procedure. We first decoupled the applied DC qubit fluxes, applying the appropriate linear correction to compensate for flux cross-talk. Then, after positioning  $Q_W$  roughly at its selected operating point, we applied a simple excitation swapping sequence for  $Q_R$  with  $R_R$  with fixed swap time (near a full swap) and varying amplitudes of positively and negatively directed pulses. Finally, we varied the applied flux on  $Q_R$  and identified the operating point as the symmetric flux point where the qubit hit the resonance for positive and negative pulses of equal amplitude. We were able to identify this point to 1 part in 5000. Because the precise choice of operating frequency for  $Q_W$  was not critical, any slight shift in frequency due to residual DC cross-talk remaining after the flux decoupling measurements was unimportant.

#### Supplementary Note 4: Calibration of the flux distortions

Implementing the digital Trotterisation of the Rabi model proposed in Ref. [6] required tuning the qubit frequency with a long series of square interaction pulses.

To achieve this, it was necessary to compensate for the filtering effects of electronics and microwave components in the line [Supplementary Fig. 1] [7]. One of the particular challenges of an experiment using a long train (up to 10  $\mu\text{s}$ ) of very short pulses (10–20 ns) is that the system is sensitive to both short- and long-time pulse distortions. These effects included the intrinsic bandwidth of the AWG and the flux-pulse amplifier, the high-pass characteristics of the bias tee, a range of low-pass effects including the Minicircuits and eccosorb filters and filtering from the skin effect of the coaxial cabling, pulse bounces at impedance mismatches, as well as more intangible effects such as transient decays in step responses. Subject to the system operating in a linear regime (e.g., the AWG operating in a comfortable amplitude range), this could be achieved by applying predistortions to the target fluxing sequence.

Supplementary Figure 4 illustrates the calibration process used in this experiment. Rather than building a single, comprehensive model for all flux distortions, we took a divide-and-conquer approach, applying a series of corrections to compensate individual effects. For processes outside the fridge, we calculated the required compensations by directly measuring the system step response using a fast oscilloscope (R&S RTO1024, 10 Gs/s sampling rate and 2 GHz bandwidth). We applied predistortion corrections sequentially, at each step correcting the longest-time behaviour and zooming in to shorter time scales once the longer-time response is successfully corrected. Once measuring through the fridge, we optimised on the shape of the two-dimensional flux-pulse resonance, the so-called “chevron”. Again, we typically focussed initially on correcting the coarse features before zooming in

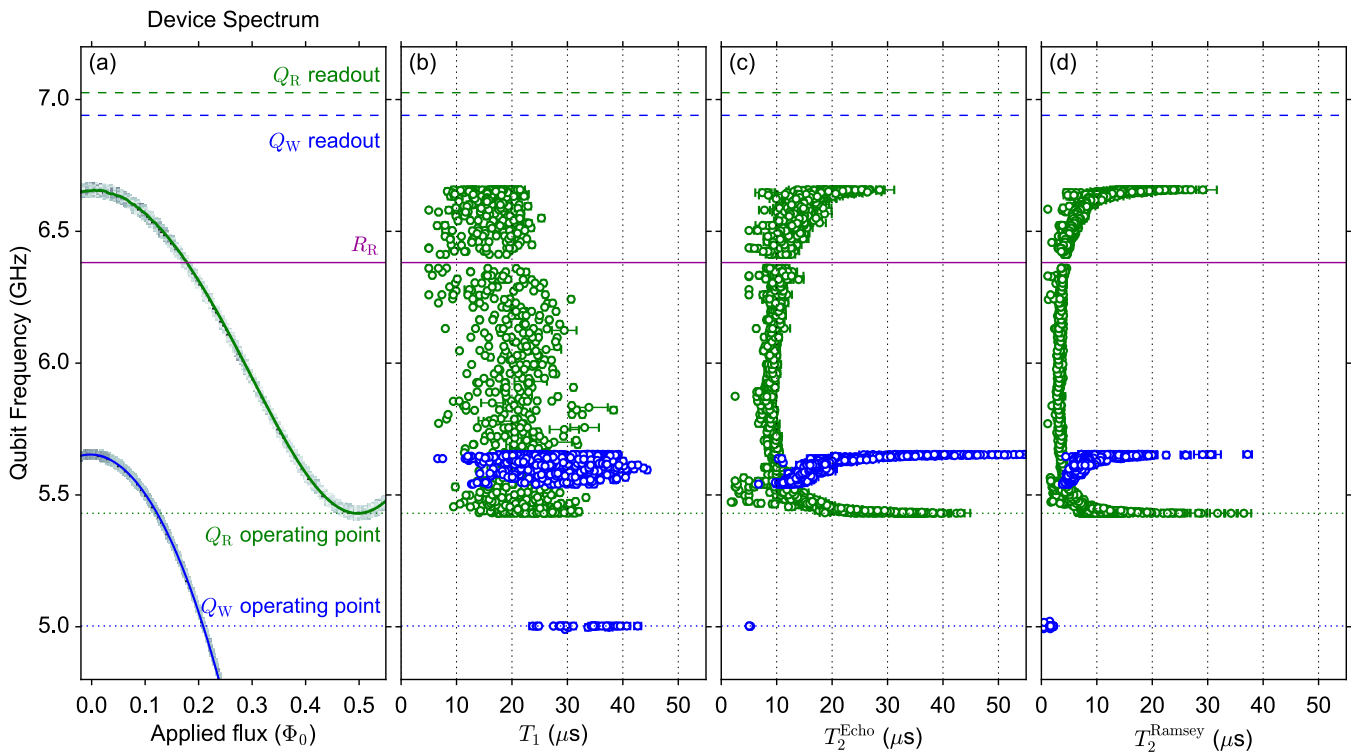

**Supplementary Figure 3. Schematic showing measured spectral arrangement for the simulator device and qubit coherence times.** (a) Measured data for the 0-1 transition of the Rabi qubit  $Q_R$  (green curve) and the Wigner qubit  $Q_W$  (blue curve) are plotted as a function of applied flux in units of  $\Phi_0$ . Also shown are the frequencies of the Rabi resonator  $R_R$  (red:  $\omega_r = 6.381\text{GHz}$ ) and the readout resonators for  $Q_R$  (green dashed:  $\sim 7.03\text{ GHz}$ ) and  $Q_W$  (blue dashed:  $\sim 6.94\text{ GHz}$ ). The operating points of the qubits for the Trotter simulation are given by the green and blue dotted lines for  $Q_R$  and  $Q_W$ , respectively. (b, c, d) Time constants measured for  $Q_R$  (green) and  $Q_W$  (blue) for (b)  $T_1$ , (c)  $T_2^{\text{Echo}}$  and (d)  $T_2^*$ . Note that, at the sweet spots, measured qubit  $T_2^*$  times here are limited by slow frequency-switching processes in the qubits such as quasiparticle tunnelling [4].

204 to finer details.

205 The procedure we used to calculate the external cor- 225  
 206 rections was: 226

- 207 • Sample a measured step response at a period  $\tau$ : 227  
 208  $x[n] = x(n\tau)$ . 228
- 209 • Construct the system impulse response function ac- 230  
 210 cording to:  $h[n] = x[n] - x[n-1]$ . 231
- 211 • Construct the system transfer matrix  $H$  from  $h[n]$  232  
 212 ( $H$  is a lower-triangular matrix with  $h[j]$  in every 233  
 213 position on the  $j^{\text{th}}$  lower diagonal). 234
- 214 • Invert  $H$  to find the transfer matrix of the so-called 235  
 215 predistortion kernel and calculate the step response 236  
 216 of the predistortion kernel as  $Hu[n]$ , where  $u[n]$  237  
 217 is the discrete Heaviside function. This numerical 238  
 218 matrix inversion step limits the length of the step 239  
 219 response that can be treated in this way. The sam- 240  
 220 pling period  $\tau$  is chosen to ensure the sampled step 241  
 221 response covers the region of interest. 242
- 222 • Fit the numerically inverted kernel step response 243  
 223 using a simple functional form which can then be 244

used to construct a high-resolution predistortion 224  
 kernel (the impulse response calculated as above 225  
 from a high-resolution step response). The down- 226  
 sampling of the step response reduces the fit func- 227  
 tion dependence on high-frequency effects. For each 228  
 step, we varied the sampling period to check that 229  
 the fit parameters were relatively robust to details 230  
 of the sampling. 231

Supplementary Figure 4(a) shows the step response 232  
 from the AWG measured after the home-built flux-pulse 233  
 amplifier [see Supplementary Fig. 1], with a zoom into 234  
 the top of the step in (b). In this case, the longest-time 235  
 response was actually an effectively linear ramp over the 236  
 long step response. Here, we used a slightly modified pro- 237  
 cedure to the one above, fitting a linear function directly 238  
 to the measured step response. Using Laplace trans- 239  
 formations, it is possible to show that a step response 240  
 with a linear ramp,  $(1 + at)u(t)$ , can be corrected us- 241  
 ing a predistortion kernel with an exponentially decaying 242  
 step response  $\exp(-at)u(t)$ . After this linear correction, 243  
 we then implemented a series of three corrections with 244  
 245

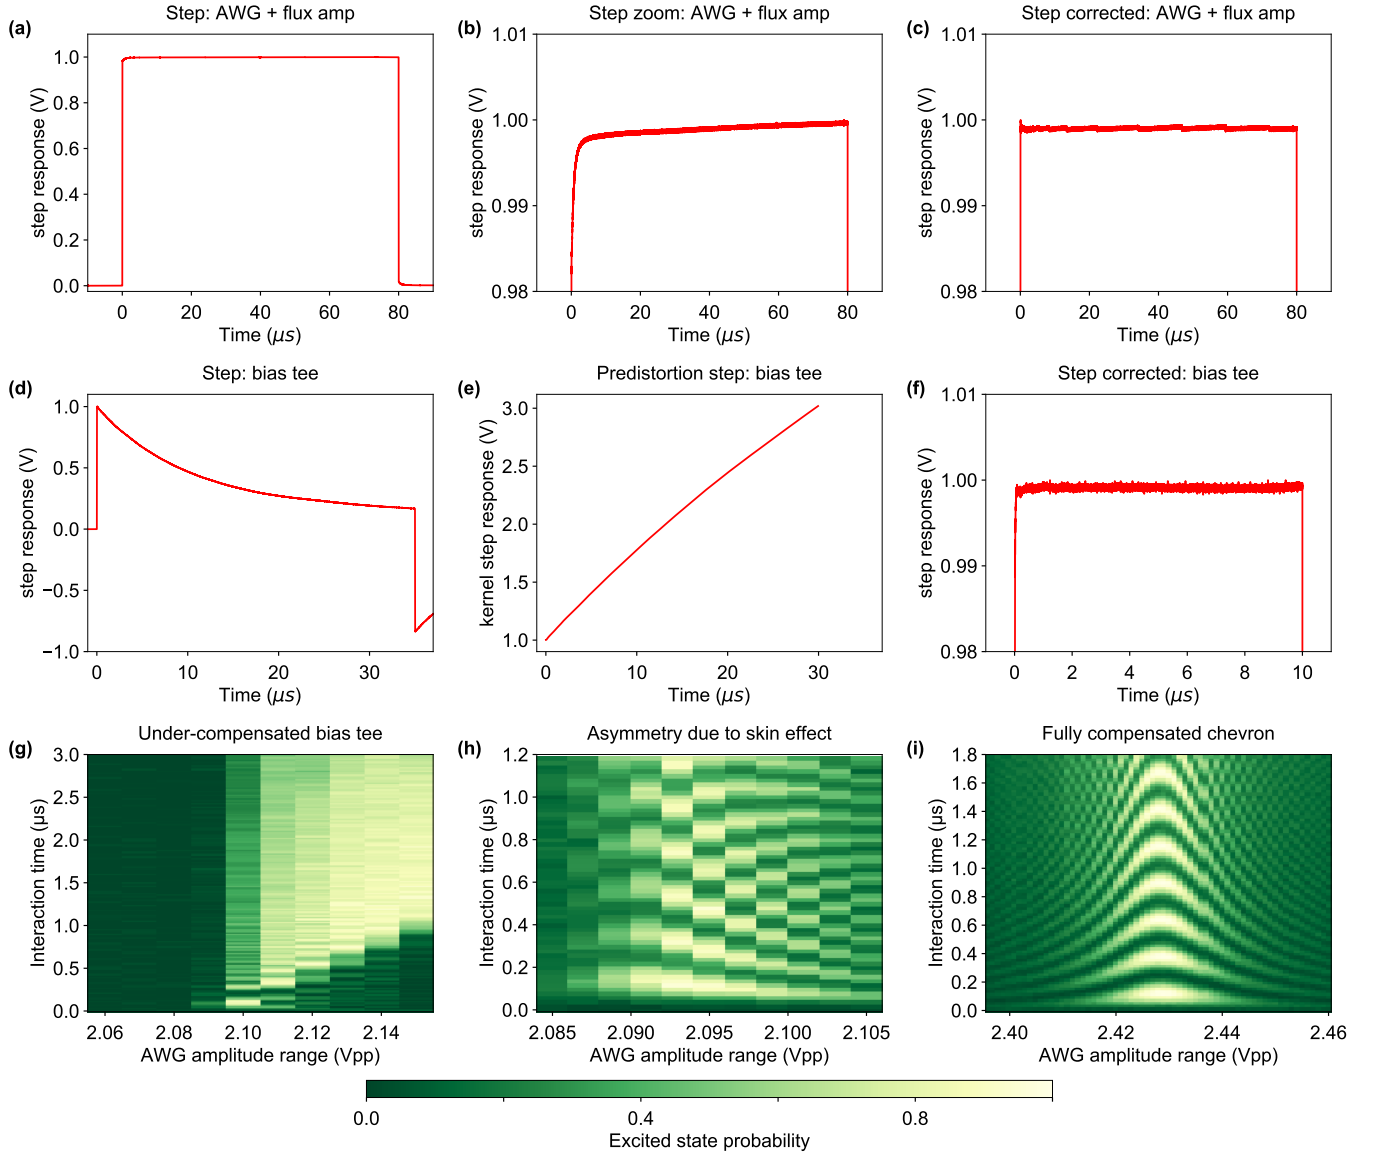

**Supplementary Figure 4. Calibration of the flux distortions.** (a,b) Step response of the amplified AWG flux channel output with a zoom in (b), measured using a fast oscilloscope. (c) Corrected step response achieved using one linear response correction and three exponential decay corrections with parameters  $(\tau, \alpha)$ :  $(5.1 \mu\text{s}, 0.0012)$ ,  $(670 \text{ ns}, 0.015)$  and  $(520 \text{ ns}, -0.00037)$  (see text for details). (d, e) Measured step response (d) and numerically calculated predistortion step response (e) after the bias-tee. (f) Corrected step response achieved using a quadratic bias tee correction (see text for details). (g) Distorted flux “chevron” measured with the corrections applied in (e). (h) Dramatically improved chevron obtained after sweeping one parameter in the bias-tee correction (that corresponding to the standard RC time constant). The asymmetric signature observed here is characteristic of the low-pass filtering effect produced by the skin effect in the coaxial cables. (i) A well-compensated chevron obtained after applying a correction for the skin effect and several more exponential decay corrections with  $(\tau, \alpha)$ :  $(350 \text{ ns}, -0.0063)$ ,  $(600 \text{ ns}, -0.0037)$ ,  $(1500 \text{ ns}, -0.002)$ ,  $(100 \text{ ns}, -0.0017)$  and  $(30 \text{ ns}, 0.0036)$ .

246 “exponential-approach” predistortion step responses of 253 vertical resolution of the AWG.  
 247 the form  $(1 + \alpha \exp(-t/\tau))u(t)$  with  $\tau$  values between 254 After correcting for distortions from the AWG and  
 248  $5 \mu\text{s}$  and  $500 \text{ ns}$  (various amplitudes), determined using 255 flux-pulse amplifier, we measured the step response af-  
 249 the above procedure. Supplementary Figure 4(c) shows 256 ter the bias tee, at the fridge input. Supplementary Fig-  
 250 the corrected step function measured after applying the 257 ures 4(d, e) show the measured step response and sam-  
 251 four initial corrections. The small but distinct sawtooth 258 pled predistortional kernel step response calculated using  
 252 structure in the otherwise flat step response is due to the 259 the above procedure (with  $\tau = 50 \text{ ns}$ ). The high-pass

characteristics of a reactive bias tee's RF input naïvely predict a kernel step response with a full initial step followed by a continually increasing linear voltage ramp. From Supplementary Fig. 4(e), however, it is clear that the kernel step response is not completely linear. We instead fit the step response to a quadratic form and proceed as above. The step response measured after compensating for the bias tee is shown in Supplementary Fig. 4(f).

Inside the fridge, we calibrated the flux-pulse distortions to optimize the shape of the flux chevron [Supplementary Figs 4(g-i)], which probes the excitation-swapping exchange interaction between qubit  $Q_R$  and resonator  $R_R$  as a function of flux-pulse amplitude and interaction time. When the qubit is exactly on resonance, the swapping interactions are expected to be slowest and strongest. As it moves off resonance, the oscillations speed up and reduce in amplitude. Interestingly, despite the good performance of the bias-tee correction when measured outside the fridge, the chevron measured with the same corrections [Supplementary Fig. 4(g)] showed a clear ramp in the start of the interaction signal (the lateral skew), consistent with an under-compensated bias tee. We do not understand the cause of this discrepancy, but corrected it empirically by adjusting the linear coefficient of the bias-tee correction. The chevron measured after optimising this correction (final linear coefficient corresponded to a time constant  $\tau = 9.7 \mu\text{s}$ ) showed the characteristic asymmetric signature of low-pass filtering from the skin effect [Supplementary Fig. 4(h)]. This was corrected by applying a kernel numerically calculated from a step response of the form  $(1 - \text{erf}(\alpha_{1\text{GHz}}/21\sqrt{t+1}))u(t)$  [8], using  $\alpha_{1\text{GHz}} = 1.7 \text{ dB}$ . Finally, we implemented another series of exponential-approach kernels with values of  $\tau$  between 1500 ns and 30 ns, to achieve the result in Supplementary Fig. 4(i).

## Supplementary Note 5: Operating principle and calibration of the photon parity and number meters

Using a number meter based on a Ramsey sequence's sensitivity to qubit frequency and  $Q_W$ 's dispersive frequency dependence on resonator photon number allows detection of average photon number with controllable sensitivity and dynamic range. When the appropriate wait time between Ramsey pulses is chosen, the same sequence also implements the standard photon parity meter used previously in, e.g., Ref. [9]. We first describe the operating principle of a generic photon meter and then describe the self-consistent calibrations used to tune up both parity and number photon meters. We use a Ramsey-based photon number meter over photon-number-resolved spectroscopy [9, 10] or qubit detection [11], because in our device it proved faster, more

flexible, more stable and better calibrated.

Suppose the resonator is in the state  $\psi = \sum_j \alpha_j |j\rangle$ . To implement the photon meter, we apply a Ramsey pair of  $\pi/2$  pulses with pulse separation  $\tau$  on  $Q_W$  at a frequency  $\Omega_W^d = \Omega_W^0 - d2\chi$ , corresponding to the  $d^{\text{th}}$  photon peak. Different photon-number frequency components accrue different phases during the variable delay between pulses, given by  $\theta_j = (j-d)2\chi\tau$ . By driving first around  $\sigma_x$  and then around  $\sigma_y$ , the  $d^{\text{th}}$  photon term ends up on the equator of the Bloch sphere. Measuring the excitation of  $Q_W$  then gives a measurement probability

$$p_W^e = \sum_j \frac{|\alpha_j|^2}{2} (1 + \sin \theta_j). \quad (1)$$

Provided  $\tau$  is chosen such that  $\theta_j$  is small for all photon components  $j$  present in the photon state,

$$p_W^e = \frac{1}{2} \left( 1 + \sum_j (j-d)2\chi\tau |\alpha_j|^2 \right), \quad (2)$$

$$= \frac{1}{2} (1 + 2\chi\tau(\bar{n} - d)). \quad (3)$$

Increasing  $\tau$  therefore increases the sensitivity of measured probability to average photon number, but decreases the accessible range of photon numbers for which the linearity condition  $\sin \theta_j \approx \theta_j$  holds. By contrast, setting  $\tau = \pi/2\chi$  ( $\theta_j = \pi$ ; not small),  $d = 0$ , and driving around  $-\sigma_x$  for the second pulse, then implements a standard photon parity measurement. In this condition, even-photon terms return the qubit to the ground state, while odd terms leave the qubit in the excited state.

An accurate calibration of a generic photon meter also requires an accurate calibration of the single-photon dispersive frequency shift  $2\chi$  and  $Q_W$ 's zero-photon frequency (which determines  $\Omega_W^d$ ). Here, we describe a self-consistent calibration of our photon meters which does not rely on quantities derived from other measurements, such as spectroscopy, and relies primarily on knowing drive-pulse frequencies, probably the most accurate control parameter we have in the experiment. At each stage, we first calibrate  $Q_W$ 's zero-photon frequency using a standard Ramsey sequence. With the performance of  $Q_W$  at the operating point (dephasing time  $T_2^* \sim 1.5 \mu\text{s}$ ), we routinely achieved frequency accuracy better than 10 kHz.

To calibrate the single-photon dispersive shift [sequence shown in Supplementary Fig. 5(a)], a calibrated SWAP pulse on  $Q_R$  transfers an excitation into  $R_R$ , and the resonator photon number is probed via  $Q_W$ . The single-photon excitation in  $R_R$  dispersively shifts the frequency of  $Q_W$  by  $2\chi$ . Driving  $Q_W$  at the calibrated zero-photon frequency around  $\sigma_x$  and then  $\sigma_y$ , the correct parity condition corresponds to the point where the curve crosses 0.5 excitation probability [Supplementary Fig. 5(d): 383 ns wait time]. This measurement is robust

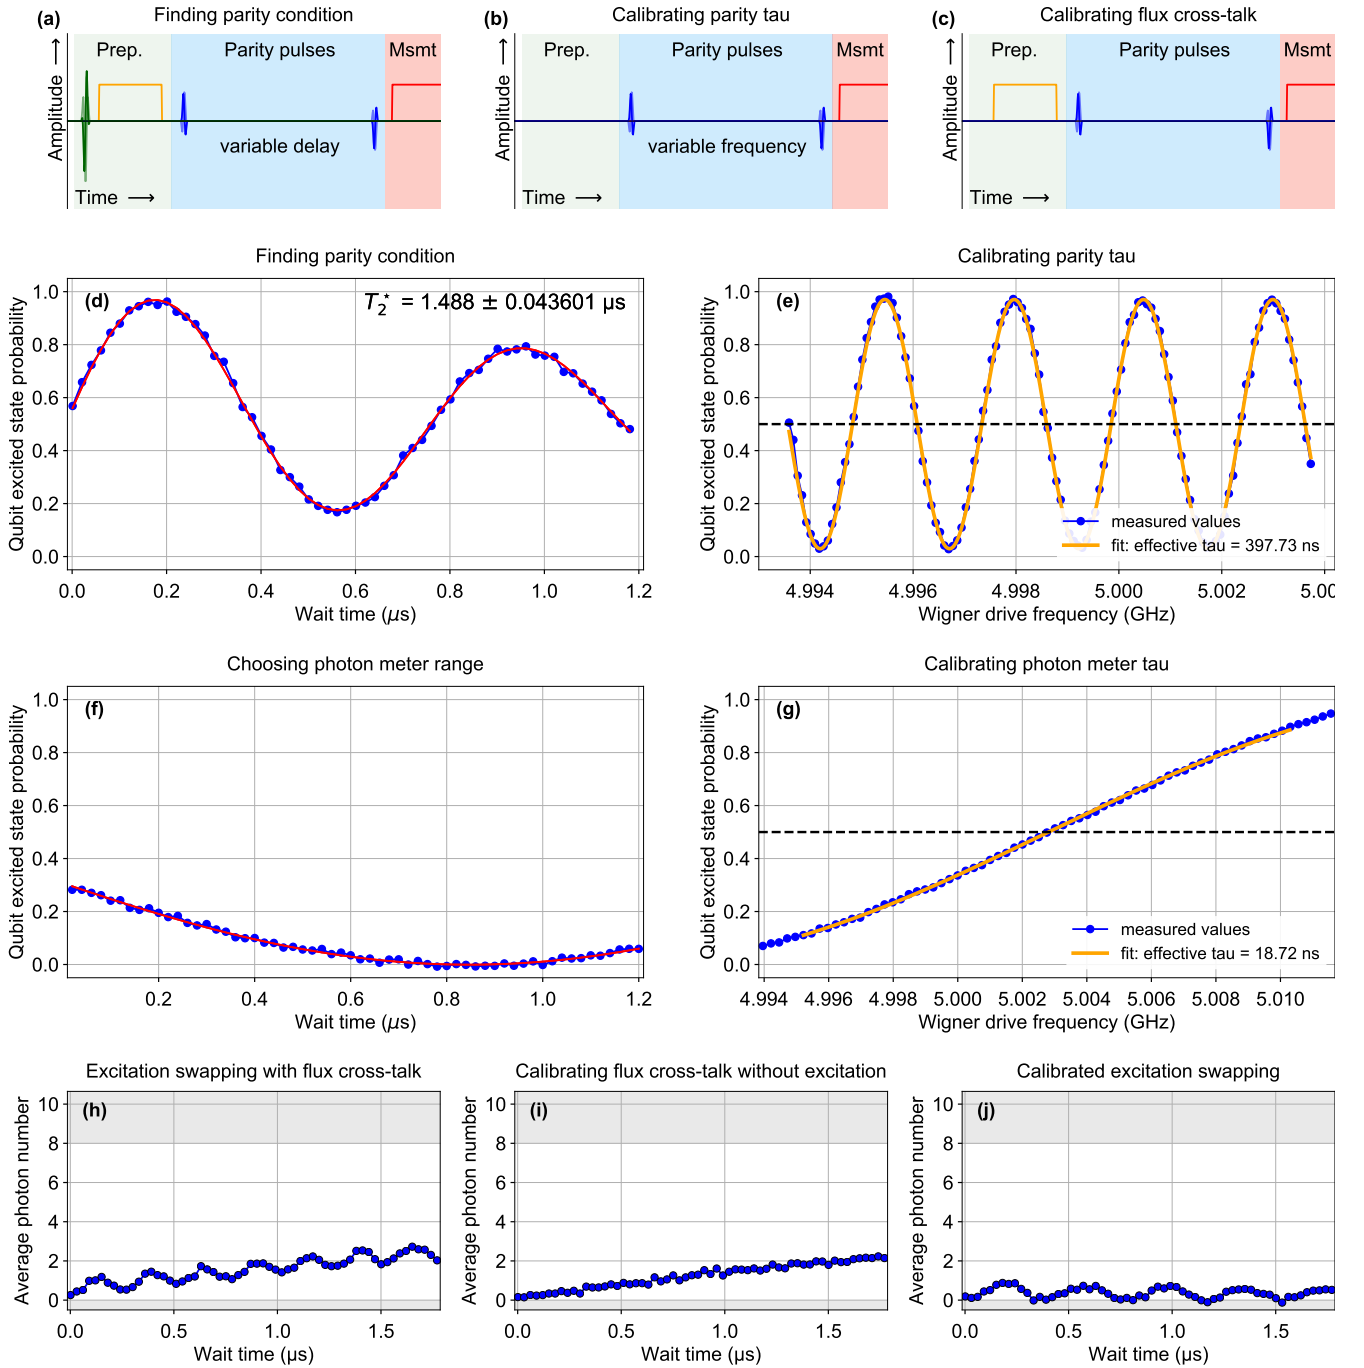

**Supplementary Figure 5. Calibration of the photon meter.** (a–c) Measurement sequences used for calibrating the parity meter, specifically: (a) the dispersive shift of  $R_R$  on  $Q_W$ , (b) the effective delay time  $\tau$  corresponding to a particular pulse separation, and (c) high-frequency flux cross-talk between flux pulses on  $Q_R$  and the flux offset of  $Q_W$ . (d) Calibrating the parity condition, identified as the first crossing point of a Ramsey experiment with one photon in the resonator, giving a pulse separation of 383 ns. (e) Calibrating the effective delay time  $\tau$  for a particular pulse separation. Using parity pulses separated by 383 ns, we calibrated the effective separation  $\tau$  to be 398 ns, corresponding to a dispersive shift  $2\chi/2\pi = -1.26$  MHz. (f) Configuring an average photon number meter for a specific dynamic range of 0–8 photons. Driving at the midpoint of the 0–8 photon frequency range, the Ramsey pulse separation is chosen to lie on the edge of the linear region. For 0–8 photons, we chose to use a separation of 4 ns. (g) Calibrating the photon meter effective  $\tau$ . Repeating the measurement described in (e), the effective pulse delay for a 4 ns separation was  $\sim 19$  ns. Comparing the oscillation period of the curves in (e) and (g) highlights the different sensitivity of the two photon meters. (h–j) Calibrating high-frequency flux cross-talk. The flux cross-talk is calibrated by measuring the photon meter without loading excitations into the resonator and corrected by adjusting the phase of the second photon meter pulse.



to both the relatively short resonator photon decay time  $T_{1,r} \sim 3.5 \mu\text{s}$  and the short dephasing time of  $Q_W$  at its operating point ( $T_2^* \sim 1.5\text{--}1.8 \mu\text{s}$  at  $\sim -650 \text{ MHz}$  detuned from its top sweet spot), because these processes both reduce the visibility of the curve, but not the oscillation period, and therefore do not affect the value of the crossing point. The zero-photon frequency calibration is the main limitation, because that calibration limits the accuracy with which the crossing point represents the correct delay time between  $\pi/2$  pulses.

The wait time identified above specifies the time between the end of the first pulse and the beginning of the second required to realise a photon parity measurement, but this does not account for the finite pulse duration. To calibrate the effective value of  $\tau$ , we fix the pulse separation and sweep the frequency of the  $Q_W$  drive generator this time without loading any photons into the resonator [Supplementary Fig. 5(b)]. For a pulse separation of 383 ns, the effective  $\tau$  is  $\sim 398 \text{ ns}$  [Supplementary Fig. 5(e)]. Note that the difference here is not quite the same as the drive pulse width used in the experiment ( $4\sigma = 12 \text{ ns}$ ). This value of  $\tau$  is related to the dispersive shift of  $R_R$  on  $Q_W$  in the usual way:  $\tau = \pi/2\chi$ , giving  $2\chi/2\pi = -1.26 \text{ MHz}$ . Note that, when used directly as a parity meter, the read-out of  $Q_W$  was calibrated using a parity pulse pair either with the usual phase on the second pulse, or a phase shifted by  $\pi$  radians. This accounted for the reduced parity visibility from the short  $T_2^*$  of  $Q_W$  at its operating point and helped to track any fluctuations in the correct parity extremes as a result of drift in qubit frequency and  $T_2^*$ .

Supplementary Figures 2(a, b) show the pulse sequences for two different photon meters used in the experiment, one with the standard Ramsey sequence [calibrations in Supplementary Figs 5(f, g)] and one an unbalanced “echo”-like sequence with an off-centre refocussing pulse (calibrations not shown). The mapping between average photon number and qubit excitation is approximately valid provided the phase advance/delay is less than 30 degrees, which corresponds to a qubit excitation of 0.25. We select the appropriate Ramsey pulse separation by driving the qubit at the frequency corresponding to the mid-point of the desired range (here, the 4-photon position), calculated from the dispersive shift and the calibrated zero-photon frequency, and choosing the separation which gives the target excitation probability of 0.25 [Supplementary Fig. 5(f)], here 4 ns. The effective  $\tau$  was calibrated, as above, to be  $\sim 19 \text{ ns}$ . Moving to the smaller  $\tau$  necessary for a higher photon number dynamic range requires frequency refocussing. Ultimately, the main limitation to the range achievable with such a photon meter is set by the bandwidth of the drive pulse.

We used a photon number meter calibrated using the above procedure to follow the excitation-swapping oscillations of a vacuum-Rabi exchange between  $Q_R$  and  $R_R$ , plotted as a function of the duration of the flux pulse on

$Q_R$  [Supplementary Fig. 5(h); sequence in Supplementary Fig. 5(a)]. The drifting baseline results from pulsed flux cross-talk between  $Q_R$  and  $Q_W$ . To correct this, we repeated the same measurement without initially exciting  $Q_R$  in order to avoid exciting photons in  $R_R$  [Supplementary Fig. 5(c)]. This curve was compensated by adjusting the drive phase of the second Ramsey pulse in the photon meter (on  $Q_W$ ), leading to the compensated measurement in Supplementary Fig. 5(j). To maximise the sensitivity of the cross-talk calibration, during the calibration,  $Q_W$  can be driven at the zero-photon frequency, which then places the expected “null” measurement result on the equator of the Bloch sphere. A modified version of this procedure can be carried out for all flux-pulse sequences of interest. Note that cross-talk compensation was also necessary to ensure an accurate calibration of the parity condition in Supplementary Fig. 5(d) above.

## Supplementary Note 6: Calibration of Wigner tomography

We implement Wigner tomography using the direct method of Ref. 9. After the algorithm part of the pulse sequence [represented in Supplementary Fig. 6(a) by a swap], a 50 ns square pulse applies a coherent displacement to the resonator photon state before the usual parity readout pulses. The phase-sensitive resonator drive tone is created via single-sideband modulation in an IQ mixer. We calibrate the drive frequency and amplitude using the already calibrated photon meter [Supplementary Figs 6(b, c), respectively]. The drive amplitude is calibrated in the middle of the linear range, where we expect the best performance. Supplementary Figure 6(c) illustrates the breakdown of the linear mapping between average photon number and  $Q_W$  excitation probability both towards the edge of the linear regime and above the range, as the higher photon components wrap around in phase. In the digital QRM simulation, for phase-sensitive Wigner tomograms (e.g., Figs 3 and 4), it was critical to maintain phase stability between the drives on  $Q_R$  and  $R_R$  during the measurement. To achieve this, the two microwave generators were synchronised using a 1 GHz reference, with frequencies set as a multiple of the 5 kHz experimental repetition rate.

Supplementary Figure 6 shows one- and two-dimensional Wigner tomograms of a zero-photon (d, e) and one-photon (f, g) state (scaled in terms of photon parity). The maximum visibilities in Supplementary Figs 6(f, g) do not reach the expected values, because these tomograms were measured without an accompanying full set of parity meter calibrations. However, the radial symmetry observed in these tomograms demonstrates the correct behaviour of the coherent resonator drive.

The curves in Supplementary Figs 6(d, g) show fits

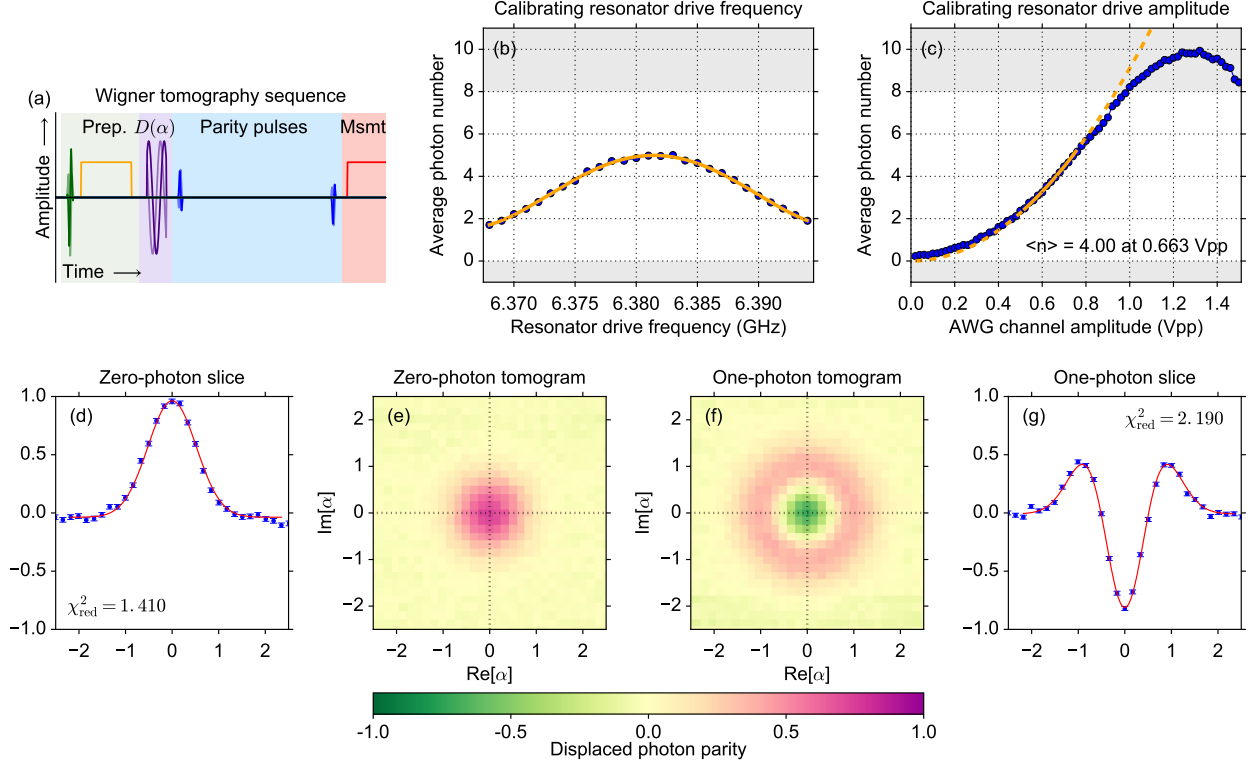

**Supplementary Figure 6. Calibration of Wigner tomography.** (a) Pulse sequence used to make the displaced photon parity measurement which provides a direct measurement of the Wigner function at a particular position in phase space. (b) This plot shows the response of  $R_R$  to the drive pulse as a function of drive frequency, as recorded by the  $Q_W$  photon meter, centred at 6.3814 GHz, with a FWHM of  $\sim 21$  MHz, in reasonable agreement with the 18 MHz expected for a 50 ns square pulse. (c) The pulse displacement amplitude is also calibrated using a low-dynamic-range photon meter with a linear range of 0–8 photons. We fit the data in the centre of the linear range, where the photon meter mapping is most accurate, with a function of the form  $\langle n \rangle = k_A A^2$ , finding  $k_A = 9.10$ . (e, f) Measured direct Wigner tomograms of zero-photon (e) and one-photon (f) states (one-photon state prepared using a calibrated SWAP pulse between  $Q_R$  and  $R_R$ ). (d, g) Direct Wigner tomogram slices of zero-photon (d) and one-photon (g) states measured using the full parity meter calibrations.

456 to the data of a classical mixture of zero-photon and  
 457 one-photon Wigner function cross-sections, with a free  
 458  $x$ -axis scaling parameter has been included in the fits.  
 459 These fits demonstrate that the measured tomograms  
 460 agree well with theoretical expectations, subject to an  
 461  $x$ -axis scaling error of  $\sim 5\%$ . That is, the fits indicate  
 462 that the amplitude calibrations result in a small system-  
 463 atic overestimate in displacement by 5%. This also agrees  
 464 with two-dimensional double Gaussian fits of individual  
 465 frames of the unconditional Wigner movie in Fig. 3(a)  
 466 of the main text, which give an average Gaussian width  
 467  $\bar{\sigma} = 0.526 \pm 0.003$ , compared with the expected value of  
 468 0.5.

#### 469 Supplementary Note 7: Analog vs Digital Jaynes- 470 Cummings Dynamics

471 Simple modelling of the Trotterised version of the full  
 472 Rabi model shows that high-quality simulations require

473 both slow dynamics and short Trotter steps (i.e., fast flux  
 474 pulsing). Such an experiment is sensitive to both short-  
 475 time and long-time effects in the flux-pulse shaping. A  
 476 simpler experiment which verifies the performance of this  
 477 flux pulsing is to implement a digital simulation of the  
 478 standard Jaynes-Cummings (JC) interaction underlying  
 479 the standard excitation-swapping experiments demon-  
 480 strated with single flux pulses [Supplementary Fig. 4].

481 In the standard continuous-wave (single-pulse) version  
 482 of a JC excitation-swapping interaction, resonance be-  
 483 tween the qubit and resonator frequencies gives rise to  
 484 maximum visibility oscillations of the excitation moving  
 485 between the two components. When detuned, the differ-  
 486 ent phases accrued by the qubit and resonator during  
 487 the interaction decrease the oscillation visibility, while  
 488 increasing the oscillation frequency. This gives rise to  
 489 the characteristic shape of the flux chevron. Significant  
 490 care is required, however, to accurately reproduce the  
 491 (analog) JC interaction with a digital pulse train.

492 Supplementary Figures 7(a, b) show analog and dig-

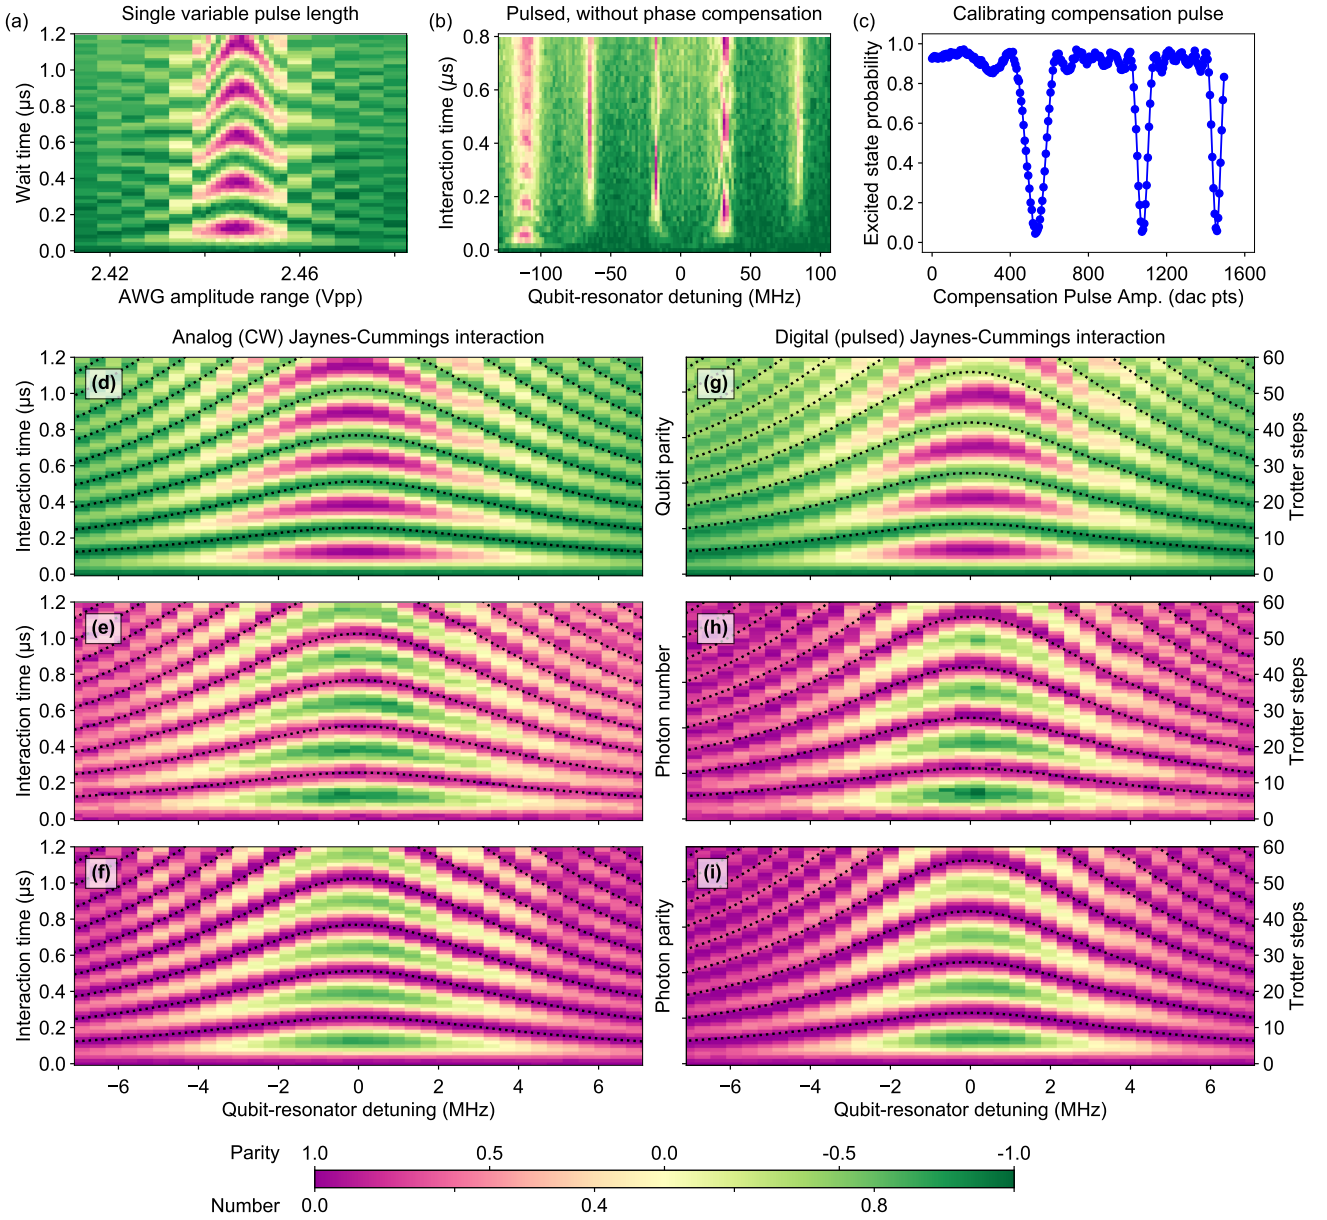

**Supplementary Figure 7. Comparison of analog and digital versions of a Jaynes-Cummings interaction.** (a) Standard analog JC chevron showing the resonant excitation swapping between qubit and resonator after the qubit is initialised in the excited state as a function of flux-pulse amplitude ( $x$  axis) and duration ( $y$  axis) (qubit-resonator detuning and interaction time, respectively). The  $x$ -axis location of the chevron ( $\sim 2.445$  Vpp) therefore defines the qubit-resonator on-resonance condition. (b) Digital JC chevron (measured under otherwise identical conditions) using a pulse duration of 20 ns showing a series of equally spaced resonances with different apparent interaction strengths. (c) We scan amplitude of a 5 ns compensation flux pulse to identify the value which enforces that the digital chevron is centred around the natural resonance position. (d-f) Standard analog and (g-i) digital JC chevrons measured by probing: (d, g) the excited state probability for  $Q_R$ , (e, h) the average photon number in  $R_R$  (linear range 0–2 photons), and (f, i) the photon parity of  $R_R$ .

493 ital versions of the JC interaction (viewed through the  
 494 qubit excitation) under otherwise identical conditions.  
 495 The digital chevron shows a series of resonances which  
 496 do not appear in analog measurements (not shown), and  
 497 there is also no chevron visible at the natural resonance  
 498 condition around 2.45 Vpp.

499 The new features relate to the extra “interaction off”

500 times in the digital version. The regular spacing between  
 501 neighbouring satellite resonances is around 50 MHz (after  
 502 converting AWG amplitude to qubit frequency), which is  
 503 the inverse pulse duration. During the interaction time,  
 504 the qubit-resonator relative phase evolves as expected.  
 505 However, in the “off” time between interaction pulses,  
 506 the qubit accrues phase at a different rate, and will hence

not have the required phase at the beginning of the next pulse for the interaction to pick up where it left off at the end of the previous pulse. Therefore, the necessary condition for observing a chevron feature at exactly the position of the natural resonance is that the qubit phase accrued (relative to the resonator) during the “off” time should be a multiple of  $2\pi$ . The observation of multiple satellite resonances is a form of digital aliasing, where the interaction will build up constructively from pulse to pulse provided the relative phase accrued between qubit and resonator during the “on” time of the pulse again differs only by an integer multiple of  $2\pi$ . However, this is an aliasing of the dynamics itself, not just an aliasing of the measurement, which could also occur in natural continuous-wave (CW) chevrons and would never lead to the observation of extra satellite peaks.

This pulsed interaction can also be viewed as a Trotterised simulation of the CW interaction. While successive interaction pulses obviously commute with each other, they do not necessarily commute with the “off” pulses. The condition on qubit-resonator phase during the “off” pulse can be understood as the condition where the Trotter error vanishes, because the Hamiltonian term resulting from the qubit detuning coincides with the identity. The satellites arise because the phase contribution from the qubit detuning in the “on” pulse is identical if the frequency change matches a multiple of  $2\pi$  phase.

To compensate for the phase error accrued in the qubit during the “off” pulses, we apply a 5 ns compensation flux pulse between interaction pulses. Using the flux-pulse amplitude which corresponds to the centre of the CW chevron, the amplitude of the compensation pulse was swept to identify the correct compensation point. In this way, very good agreement was achieved between the digital JC dynamics and the traditional analog version [Supplementary Fig. 7(d-i)]. The main differences are a slightly reduced visibility because of the increased experiment time, and a slightly lower effective coupling frequency ( $g/2\pi \sim 1.8$  MHz, instead of  $\sim 1.95$  MHz). The latter most likely arises from residual short-time pulse imperfections which do not contribute significantly to the long interactions in the analog form.

#### Supplementary Note 8: Trotter simulation with excited and ground initial states

In the degenerate-qubit case, when understood in terms of the cavity trajectories in phase space, it is clear that the structure of the expected quantum Rabi dynamics at ultrastrong coupling (USC) or deep-strong coupling (DSC) should not depend on whether the qubit starts in the ground or excited state. This contrasts with the JC interaction, where the  $|g, 0\rangle$  state is decoupled from the rest of the system and the system will only undergo nontrivial dynamics if an initial excitation is loaded in

the system. Indeed, in a natural USC/DSC system, if it were possible to turn the coupling on and off rapidly, it would be extremely interesting to watch an uncoupled-system ground state evolve into a state with excitations in the qubit and cavity. In this digital simulation, however, this is less satisfying, since the protocol in any case involves regularly injecting excitation into the system in the form of qubit flipping pulses. Most of the results reported here therefore take the more conservative position of initialising the system with an excitation, with the motivation that observing a difference between the simulated dynamics and what would be expected in a weak-coupling scenario could then only result from the simulated counter-rotating terms. Although there were some stability issues during the measurement with ground-state initialisation, there is nevertheless extremely good agreement between the two cases, for example with the timing of the revivals in both cases agreeing with the theoretical predictions. For this particular measurement of ground-state initialisation, qubit revivals are observed even out to  $r \equiv g^R/\omega_q^R \sim 0.9$ .

#### Supplementary Note 9: Trotterisation performance vs Trotter order

As discussed already, initial modelling of a Trotterised Rabi simulation showed that unusually low qubit-resonator coupling between  $Q_R$  and  $R_R$  was required to be able to achieve reasonable simulation fidelities given the hard bandwidth limitations of flux-based fast frequency tuning. This, however, required longer experimental times for the simulations, which in turn placed significant constraints on qubit and resonator coherence. Indeed, the shorter-than-anticipated resonator coherence time proved to be the biggest limitation. As a result, it was critical to use all available measures to minimize the Trotter error in our simulations, given the limits on the shortest achievable Trotter step sizes.

The accuracy of the Trotter approximation is set by the amount of non-commutativity between different components in the step [12]. While first-order Trotterisations [ $\exp(A + B) \approx \exp(A)\exp(B)$ ] lead to Trotter errors that scale with single commutators (quadratically with simulation time), higher-order Trotterisations can be used to eliminate lower orders of Trotter error. For example, the symmetry of a second-order Trotterisation [ $\exp(A + B) \approx \exp(A/2)\exp(B)\exp(A/2)$ ] ensures that first-order error terms (related to single commutators) cancel, pushing the largest Trotter error terms out to third order in simulation time. For two-part Hamiltonians, however, second-order Trotterisation in practice only involves modifying the pulses in the first and last Trotter steps. All the results in the main text were obtained using a second-order Trotterisation. The plots in

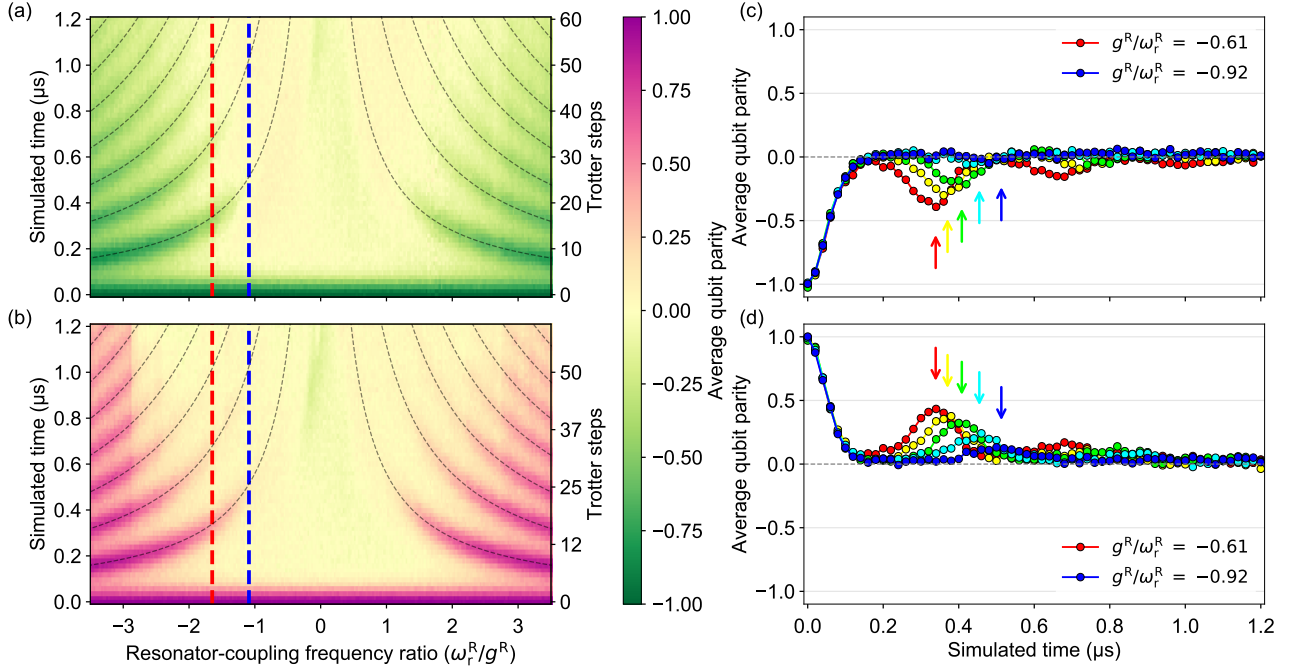

**Supplementary Figure 8. Comparison of average qubit parities for simulations with different initial states.** The plots show simulated qubit parity dynamics when initialising in the excited (top) versus the ground state (bottom). (a, b) These plots directly verify the symmetrical behaviour of the simulated Rabi model. (c,d) Line slices are plotted at evenly spaced frequencies between the red and blue dashed lines in (a, b). Arrows in (c, d) show the expected time for the first revival.

612 Supplementary Fig. 9 illustrate that this was absolutely  
 613 critical in order to extend the simulations into the DSC  
 614 regime. The first-order and second-order Trotterisation  
 615 agree reasonably well at  $r < 0.5$ , but behave fundamental  
 616 differently at the higher values. The first-order simula-  
 617 tion starts to show qualitatively different behaviour for  
 618 relative coupling strengths  $r \gtrsim 0.5$ . In particular, only in  
 619 the second-order case are the characteristic plateaus and  
 620 revivals of the DSC regime observable.

#### 621 Supplementary Note 10: Trotterisation perfor- 622 mance vs Trotter step size

623 As illustrated in Supplementary Fig. 9, the effects of  
 624 Trotter error are most visible in the high  $r$  regimes,  
 625 which is reasonable, considering that for low  $r$ , the Rabi  
 626 model is well approximated by the JC model where the  
 627 excitation-nonconserving terms (non-commuting with  
 628 the excitation-conserving terms) do not play a signifi-  
 629 cant role. This was also visible when studying the per-  
 630 formance of the simulation as a function of the Trotter  
 631 step size.

632 Measurements and numerical simulations show signifi-  
 633 cant reduction in Trotter error as the number of Trotter  
 634 steps over  $1.2 \mu\text{s}$  increased from 24 to 60. The Trotter  
 635 error shows up in two ways, namely the central features  
 636 departing from the expected plateaus, and a tendency for

637 the dynamical landscape to “break apart”, even out into  
 638 the lower coupling regimes. In the measured results and  
 639 the simulation with decay, the fine details do not appear  
 640 as strongly, but the effect appears to wash out the oscil-  
 641 lation dynamics more rapidly. Only at the smallest step  
 642 size are these effects absent from the measured results,  
 643 and in the ideal simulations (without decoherence) there  
 644 are even then central features which only disappear at a  
 645 still smaller 10 ns step size. The measured results agree  
 646 very closely with the numerical Trotter dynamics which  
 647 include only the effect of photon decay, again highlight-  
 648 ing that the primary limiting factor in our experiments  
 649 was  $T_{1,r}$ . It is clear from these results that moving to-  
 650 wards the smallest possible Trotter steps will be a key  
 651 challenge for reaching quantum supremacy in complex  
 652 quantum simulations.

#### 653 Supplementary Note 11: Qubit entropy dynamics

654 In the Rabi model, as the resonator states separate, the  
 655 qubit-resonator entanglement causes the reduced qubit  
 656 state to collapse towards the maximally mixed state. A  
 657 revival occurs in the qubit purity only if the underlying  
 658 entanglement is still present when the resonator states  
 659 re-coalesce at the origin in phase space. While many pos-  
 660 sible uninteresting effects may cause an initial collapse in  
 661 qubit purity, a revival in purity is a signature of entan-

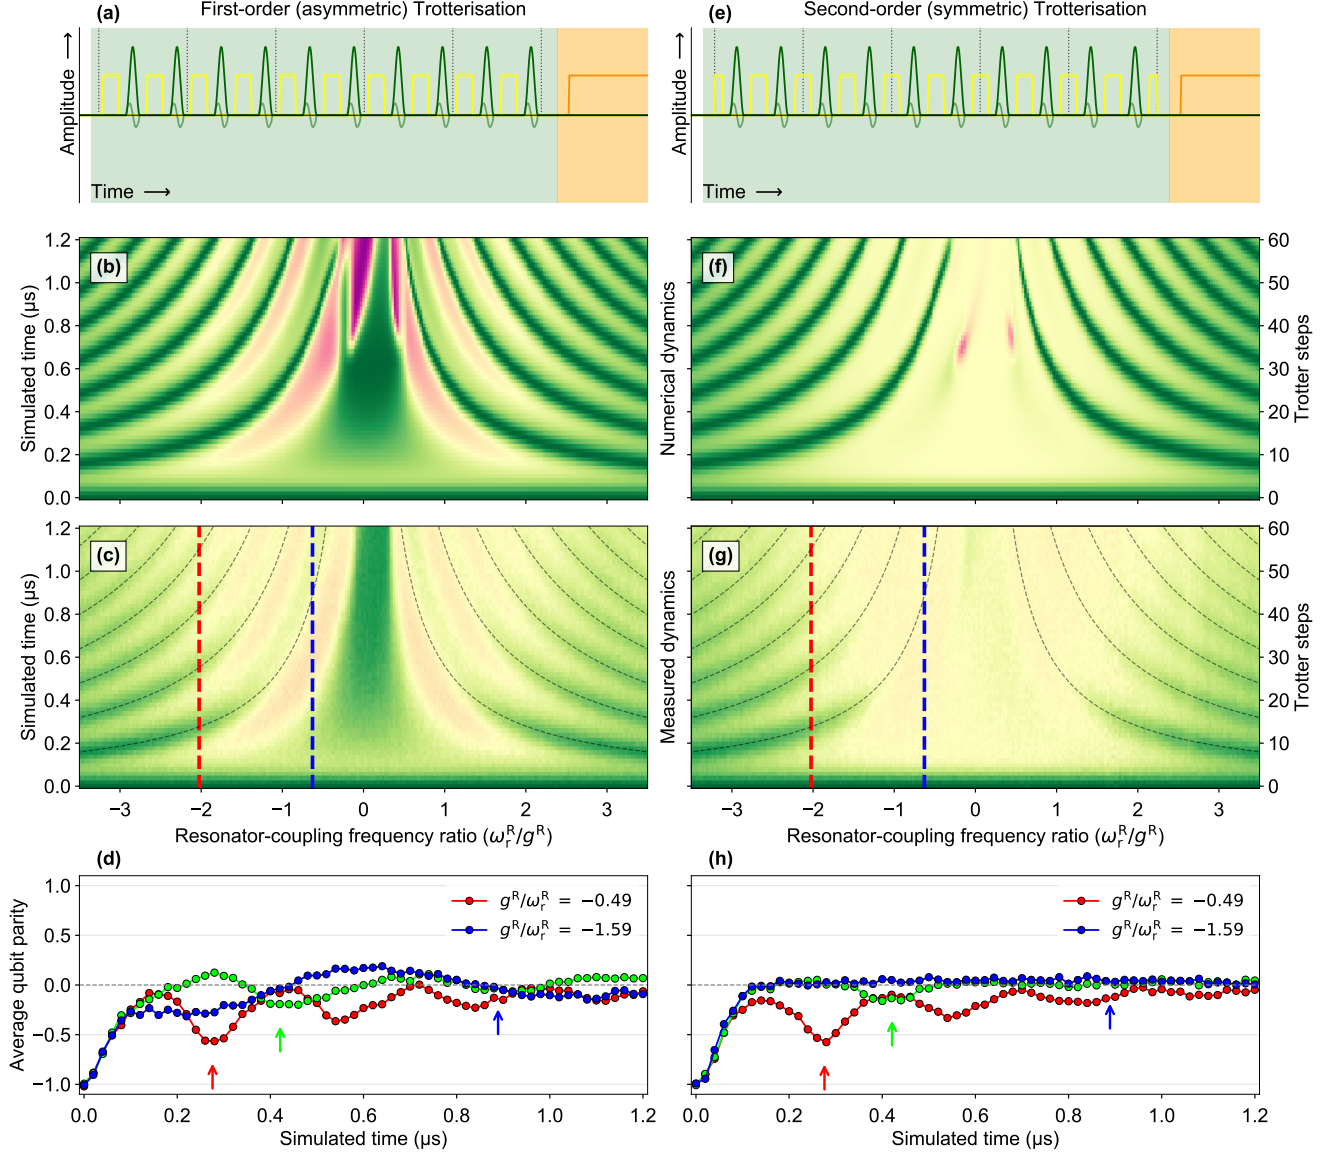

**Supplementary Figure 9. Comparison of simulation performance for different orders of Trotterisation.** Results shown for asymmetric, first-order (a–d) and symmetric, second-order (e–h) Trotterisation. (a, e) Pulse sequences for the first-order (a) and second-order (e) Trotterisation. (b, f) Numerical simulations of the Trotterised Rabi model for the ideal case with no decay. Note that the sharp features in the centre of the plots (DSC regime) are not artifacts of the numerics, but Trotter error related to the 20 ns step size (these features disappear for 10 ns pulses). (c, g) Experimental quantum simulations for first-order (c) and second-order (g) Trotterisation, showing very good agreement with the numerical results in (b, f). (d, h) Vertical line slices are plotted for evenly spaced resonator frequencies between the red and blue dashed lines in plots (c) and (g).

662 glement with another system, in this case the resonator.  
 663 After each Trotter step, a tomographically complete set  
 664 of measurements on  $Q_R$  was used to reconstruct its re-  
 665 duced state using maximum-likelihood tomography. We  
 666 use the von Neumann entropy to characterise the purity  
 667 of the reduced qubit state and observe revivals in qubit  
 668 parity out to  $r > 0.8$  [Supplementary Fig. 11(a)], con-  
 669 sistent with the observed revivals in qubit parity. While  
 670 the observed revivals shown in the slices [Supplementary

671 Fig. 11(b)] appear smaller than the qubit parity revivals,  
 672 in fact this is deceiving, resulting from the fact that pu-  
 673 rity (as with other entropy measures) is a quadratic func-  
 674 tion of the qubit population difference. The inset shows  
 675 that the background noise of this signal is small and that  
 676 the revivals are quite distinct. Moreover, plotting an ap-  
 677 propriate square root of the entropy (not shown) shows  
 678 that the revivals are consistent with the qubit parity case.

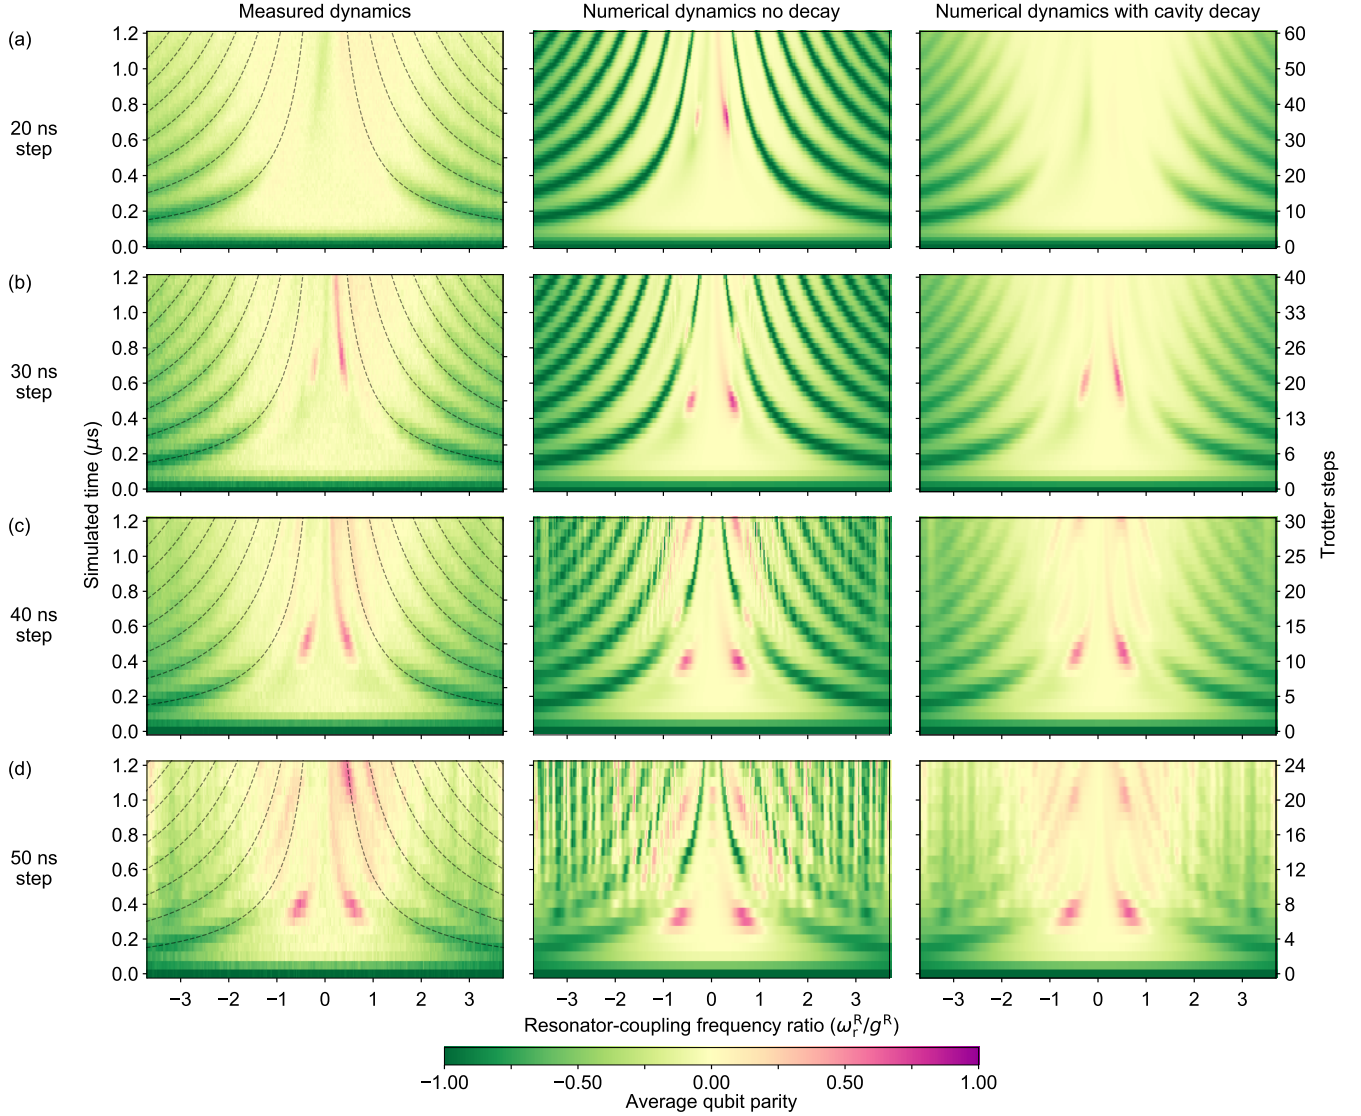

**Supplementary Figure 10. Comparison of simulation performance for various Trotter step sizes.** The results show measurements (left), numerical simulations with no decay (middle) and numerical simulations with the measured  $T_{1,r} = 3.5 \mu\text{s}$ : (a) 20 ns steps (60 Trotter steps), (b) 30 ns steps (40 Trotter steps), (c) 40 ns steps (30 Trotter steps) and (d) 50 ns steps (24 Trotter steps).

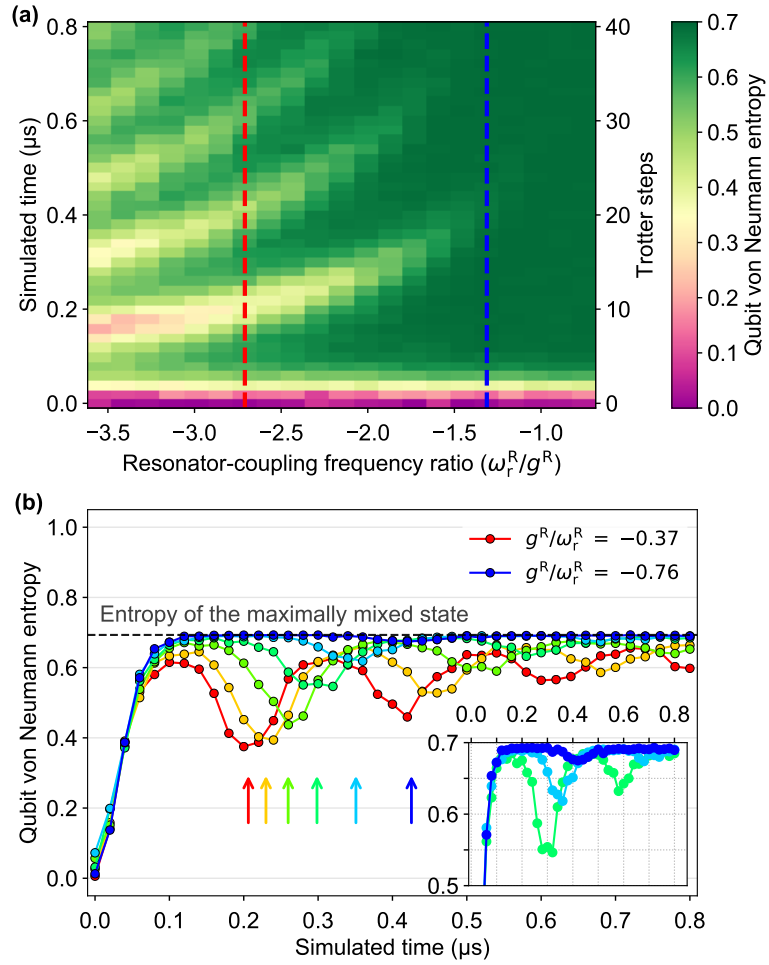

**Supplementary Figure 11. Measured entropy dynamics of the qubit during the quantum simulation.** Entropy is calculated from tomographic reconstructions of the reduced state of qubit  $Q_R$  as a function of simulation time and relative resonator-coupling frequency. (a) Image plot showing the dynamics of qubit quantum von Neumann entropy over different USC and DSC coupling regimes. (b) Line slices are plotted at evenly spaced frequencies between the blue and red dashed lines. Inset: Zoom showing revivals.



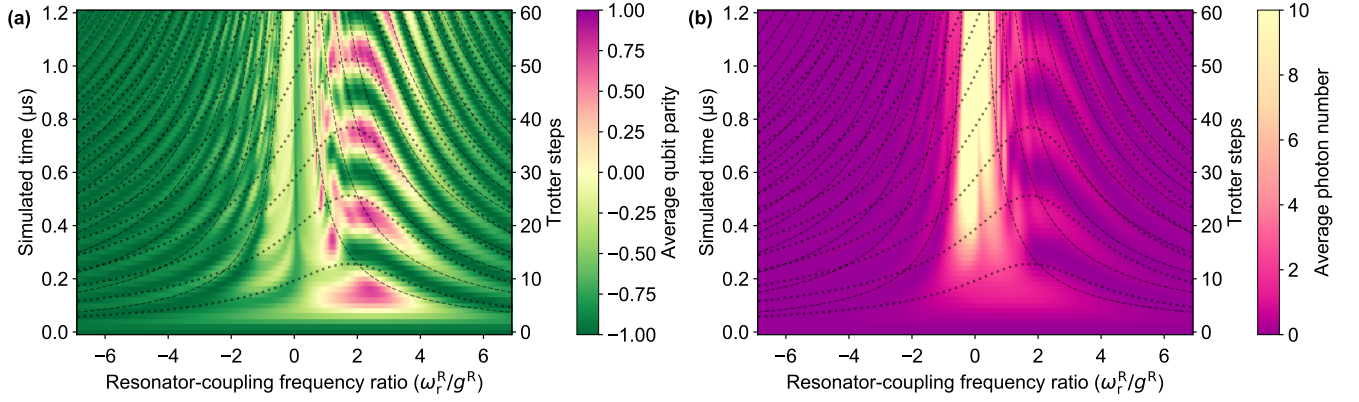

**Supplementary Figure 12.** Ideal Rabi dynamics for the nondegenerate-qubit case with  $g^R/\omega_q^R \sim 0.48$  showing the standard Jaynes-Cummings exchange dynamics emerging from the DSC Rabi dynamics when  $\omega_q^R$  becomes significantly larger than  $g^R$ . (a) Average qubit parity. (b) Average photon number. (Colour scale bar truncated to show details at low photon number.) Expected revival times for pure, degenerate-qubit QRM dynamics (dashed curves) are compared with expected exchange oscillation periods for a pure nondegenerate-qubit Jaynes-Cummings interaction. The colour scale range was chosen to provide visible detail in low-photon regimes (maximum photon number reached in saturated central region  $\sim 100$  photons).

679 **Supplementary References**

- 680 [1] Barends, R. *et al.*, Minimizing quasiparticle generation  
681 from stray infrared light in superconducting quantum cir-  
682 cuits. *Appl. Phys. Lett.* **99**, 113507 (2011).
- 683 [2] Asaad, S. *et al.*, Independent, extensible control of same-  
684 frequency superconducting qubits by selective broadcast-  
685 ing. *npj Quantum Inf.* **2**, 16029 (2016).
- 686 [3] Gambetta, J. *et al.*, Investigating surface loss effects in  
687 superconducting transmon qubits. *IEEE T. Appl. Super-*  
688 *con.* **27**, 1700205 (2017).
- 689 [4] Ristè, D. *et al.*, Millisecond charge-parity fluctuations  
690 and induced decoherence in a superconducting transmon  
691 qubit. *Nat. Commun.* **4**, 1913 (2013).
- 692 [5] Koch, J. *et al.*, Charge-insensitive qubit design derived  
693 from the Cooper pair box. *Phys. Rev. A* **76**, 042319  
694 (2007).
- 695 [6] Mezzacapo, A. *et al.*, Digital quantum rabi and dicke  
696 models in superconducting circuits. *Sci. Rep.* **4**, 7482  
697 (2014).
- 698 [7] Johnson, B.R., PhD Dissertation, Yale University (2010).
- 699 [8] Wigington, R. & Nahman, N., Transient analysis of coax-  
700 ial cables considering skin effect. *Proc. IRE* **45**, 166–174  
701 (1957).
- 702 [9] Vlastakis, B. *et al.*, Deterministically encoding quantum  
703 information using 100-photon Schrödinger cat states. *Sci-*  
704 *ence* **342**, 607–610 (2013).
- 705 [10] Kirchmair, G. *et al.*, Observation of quantum state col-  
706 lapse and revival due to the single-photon Kerr effect.  
707 *Nature* **495**, 205–209 (2013).
- 708 [11] Juliusson, K. *et al.*, Manipulating fock states of a har-  
709 monic oscillator while preserving its linearity. *Phys. Rev.*  
710 *A* **94**, 063861 (2016).
- 711 [12] Lloyd, S., Universal quantum simulators. *Science* **273**,  
712 1073–1078 (1996).
