# Supplementary material for: Experimentally simulating the dynamics of quantum light and matter at deep-strong coupling
Source: PubMed Central journal article supplement (PMC5700074; doi:10.1038/s41467-017-01061-x), 2017-11-23
Supplement: 41467_2017_1061_MOESM2_ESM.pdf [file 41467_2017_1061_MOESM2_ESM.pdf]

## Description of Additional Supplementary Files

File Name: Supplementary Movie 1

Description: **Photon dynamics in phase space in the DSC regime (degenerate-qubit case) from maximum-likelihood Wigner tomography.** (a) Movie, measured over  $\sim 40$  hours, showing the phase-space evolution of the resonator reduced state for  $g^R/\omega_r^R \sim 0.9$  (frames labelled by Trotter step  $n$  and simulated time). Plotted tomograms are maximum-likelihood reconstructions of direct Wigner tomography measured data with a systematic phase correction [see Methods]. Clearly observed are the creation of two well-resolved, rotating peaks and their subsequent re-coalescence, which are characteristic signatures of DSC dynamics. The final frame shows the full trajectories determined from 2D double-Gaussian fits to the raw data. Deviation from the ideal circular trajectories (orange curves) arises from photon decay. The measured trajectory shows excellent agreement with a numerical Trotter simulation at  $g^R/(2\pi) = 1.79$  MHz which includes resonator  $T_{1,r} = 3.5$   $\mu$ s (green curves).
